# Supplementary material for: Impacts of the development of mineral metal resources on surface water quality in the Mongolian Plateau based on meta-analysis
Source: Frontiers journal article supplement (doi:10.3389/fenvs.2022.1048500), 2022-11-10
Supplement: Data_Sheet_1.ZIP [file Data_Sheet_1.ZIP]

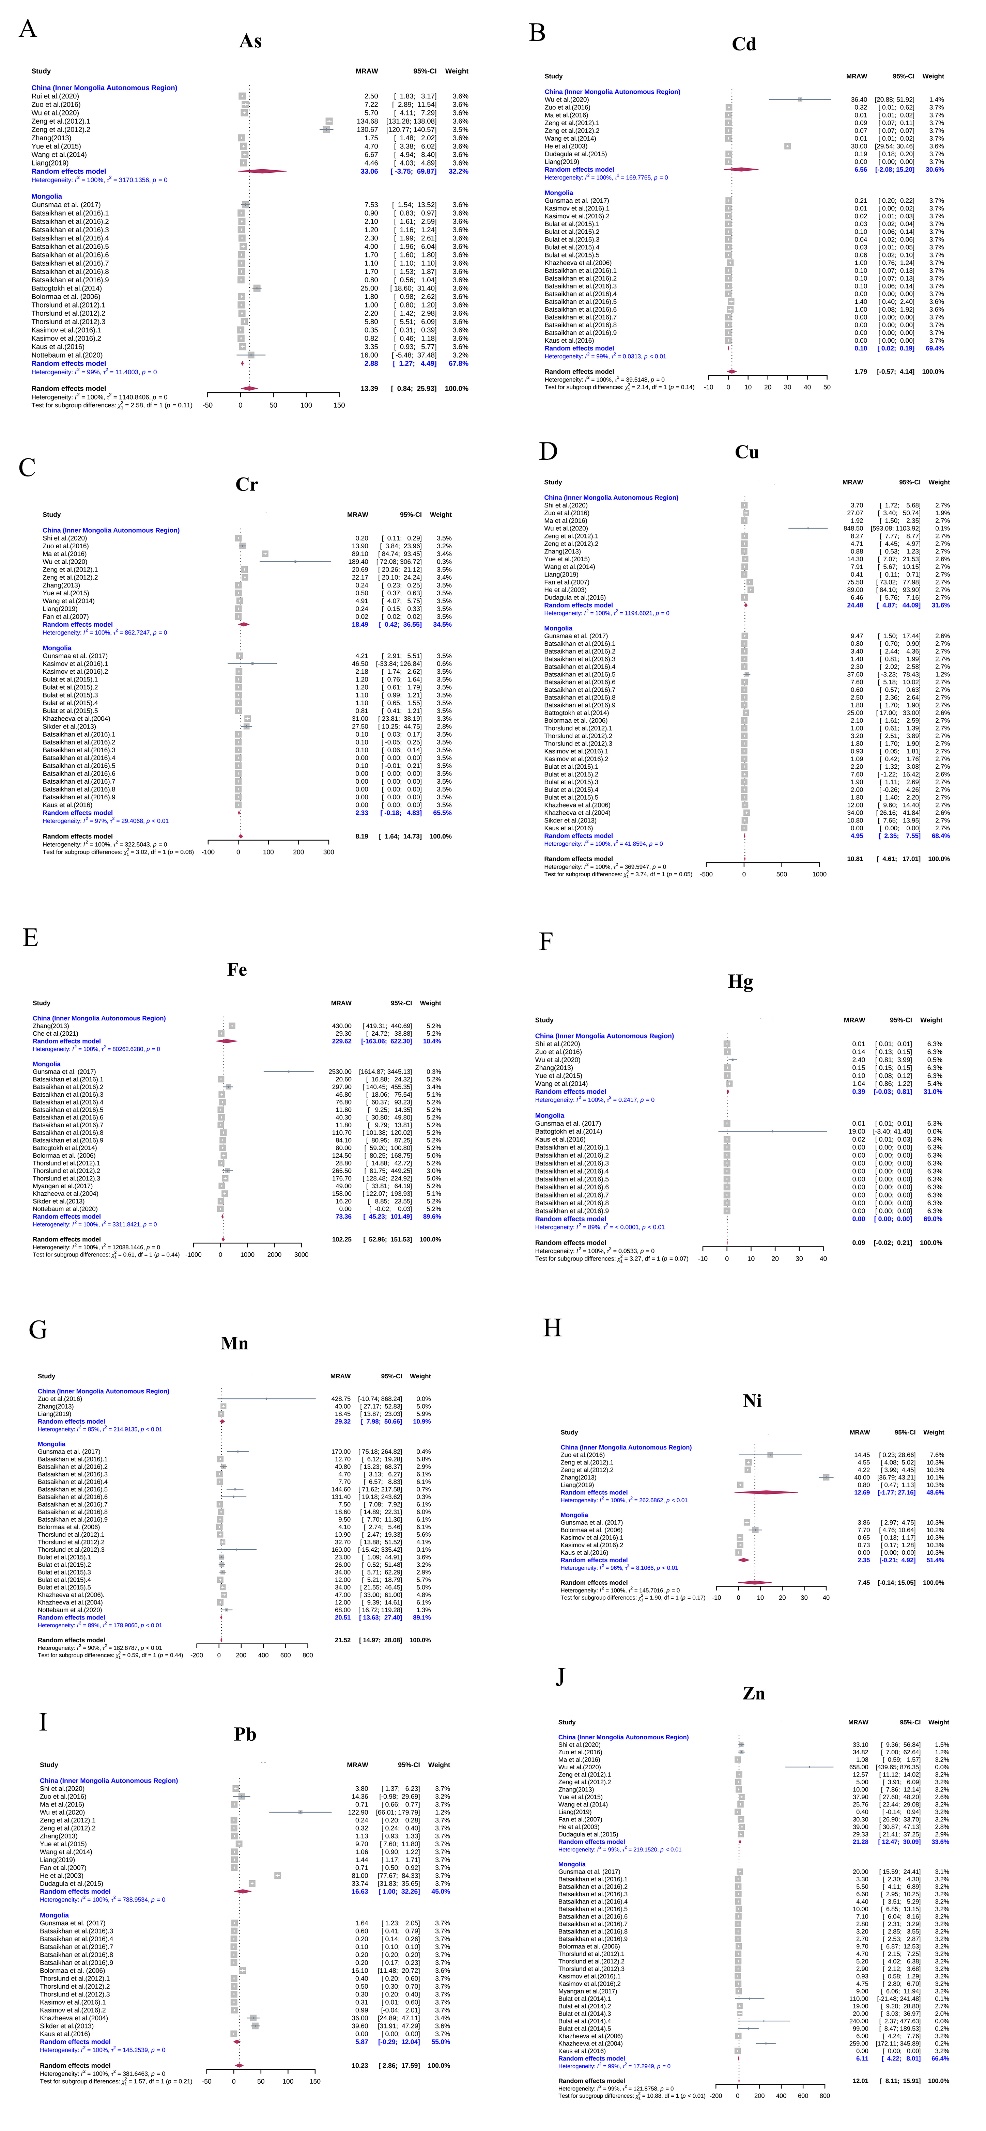


**Figure S1. Forest plots of heavy metal content in surface water overlying water in Mongolian Plateau based on country subgroups: (A) As; (B) Cd; (C) Cr; (D) Cu; (E) Fe; (F) Hg; (G) Mn; (H) Ni; (I) Pb; (J) Zn.**

**
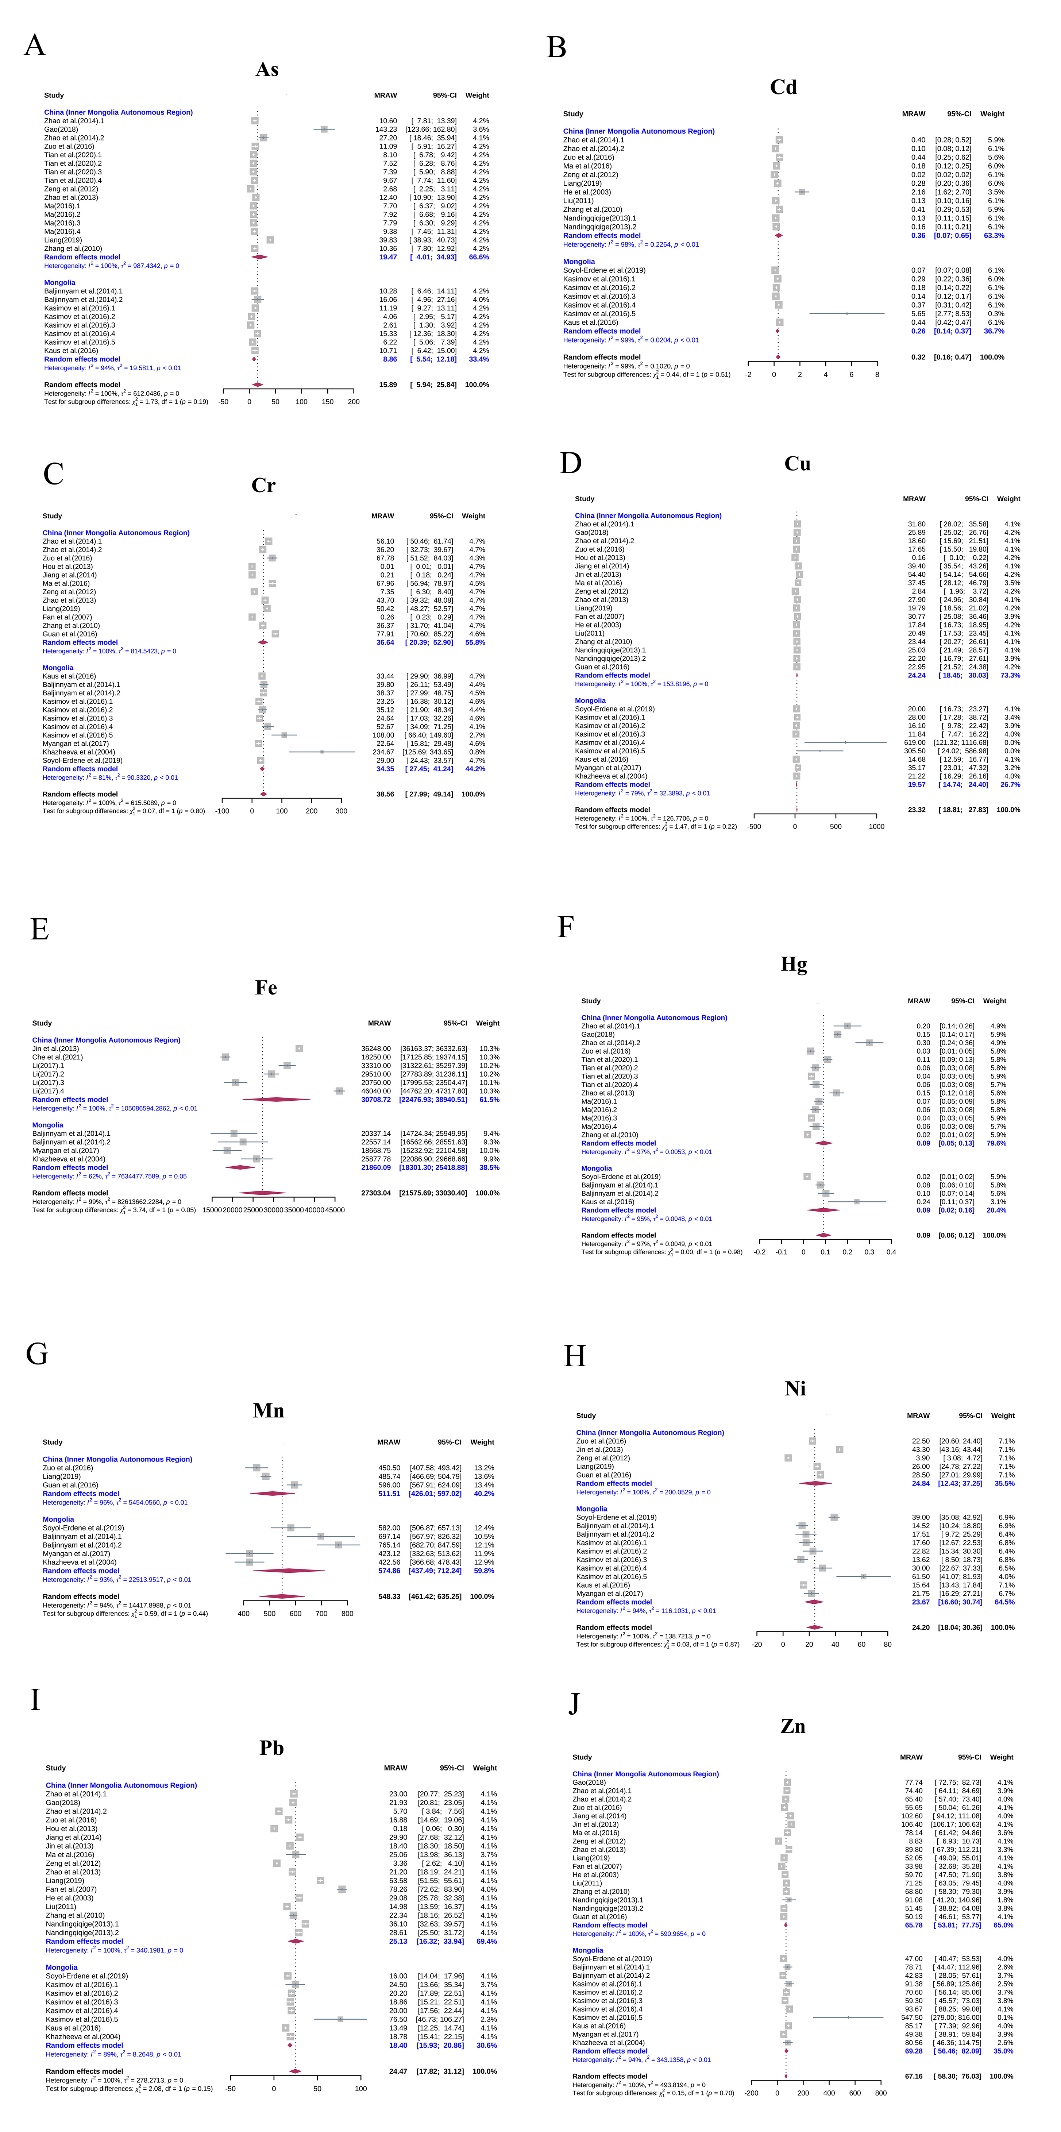
**

**Figure S2. Forest plots of heavy metal content in surface water sediments of Mongolian Plateau based on country subgroups: (A) As; (B) Cd; (C) Cr; (D) Cu; (E) Fe; (F) Hg; (G) Mn; (H) Ni; (I) Pb; (J) Zn.**

**
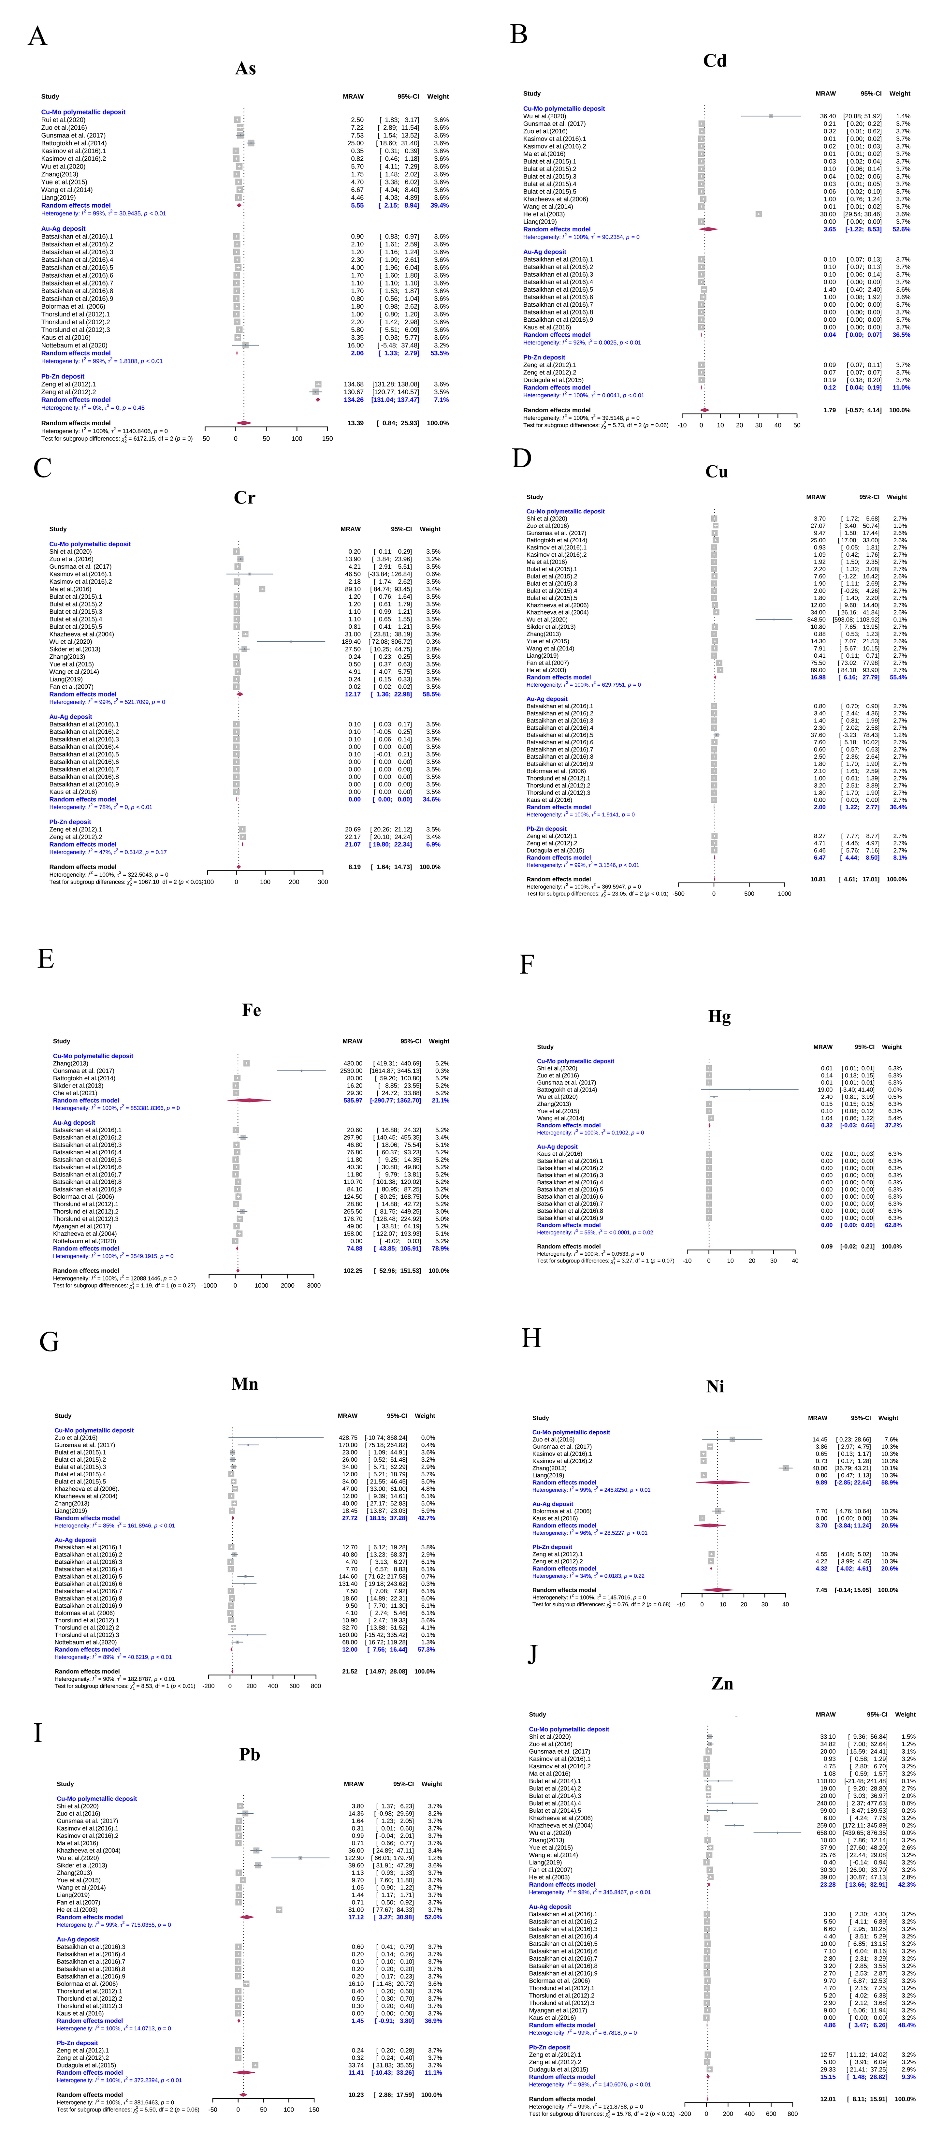
**

**Figure S3. Forest plots of heavy metal content in surface water overlying water in Mongolian Plateau based on subgroups of metal mines: (A) As; (B) Cd; (C) Cr; (D) Cu; (E) Fe; (F) Hg; (G) Mn; (H) Ni; (I) Pb; (J) Zn.**

**
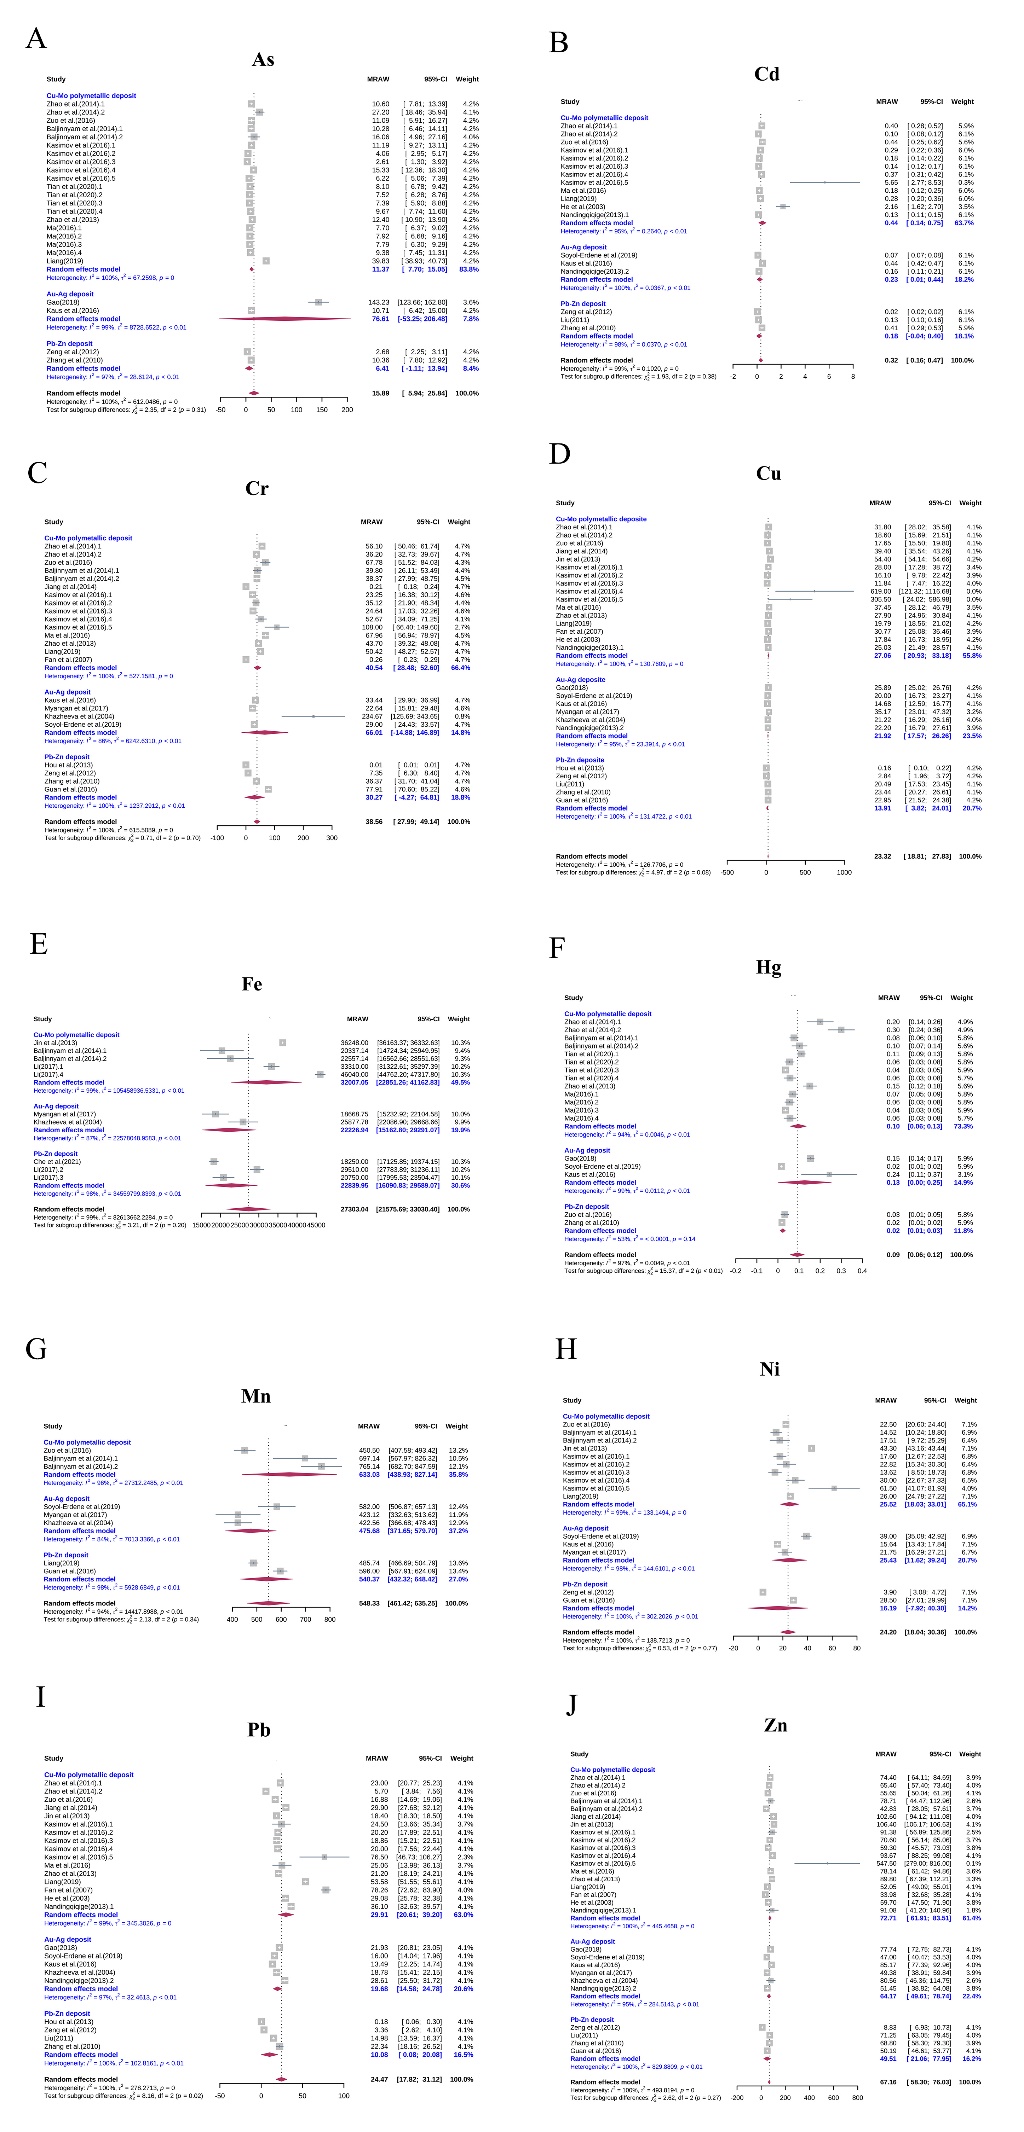
**

**Figure S4. Forest plots of heavy metal content in surface water sediments in Mongolian Plateau based on subgroups of metal mines: (A) As; (B) Cd; (C) Cr; (D) Cu; (E) Fe; (F) Hg; (G) Mn; (H) Ni; (I) Pb; (J) Zn.**

**
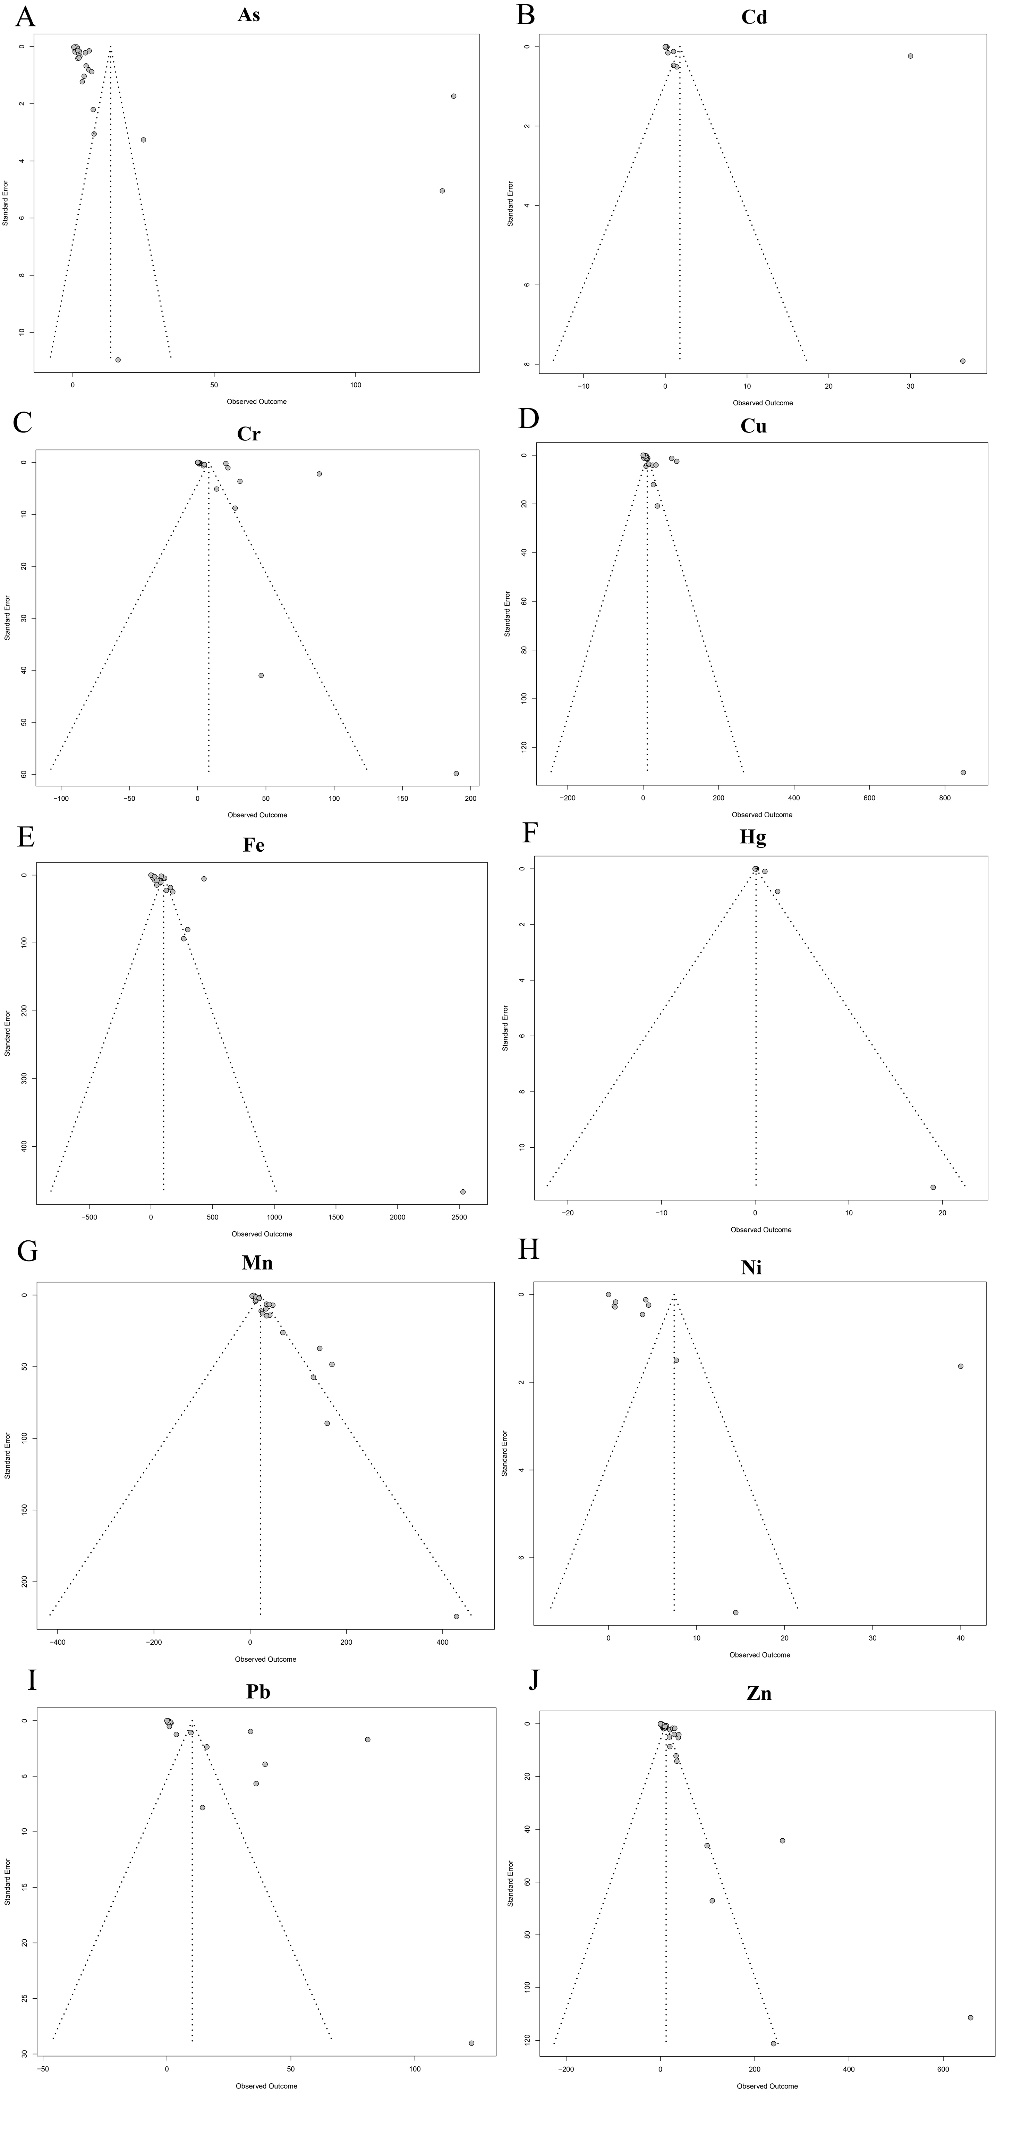
**

**Figure S5. Funnel plots of heavy metal content in overlying water on the Mongolian Plateau used for assessing publication bias: (A) As; (B) Cd; (C) Cr; (D) Cu; (E) Fe; (F) Hg; (G) Mn; (H) Ni; (I) Pb; (J) Zn.**

**
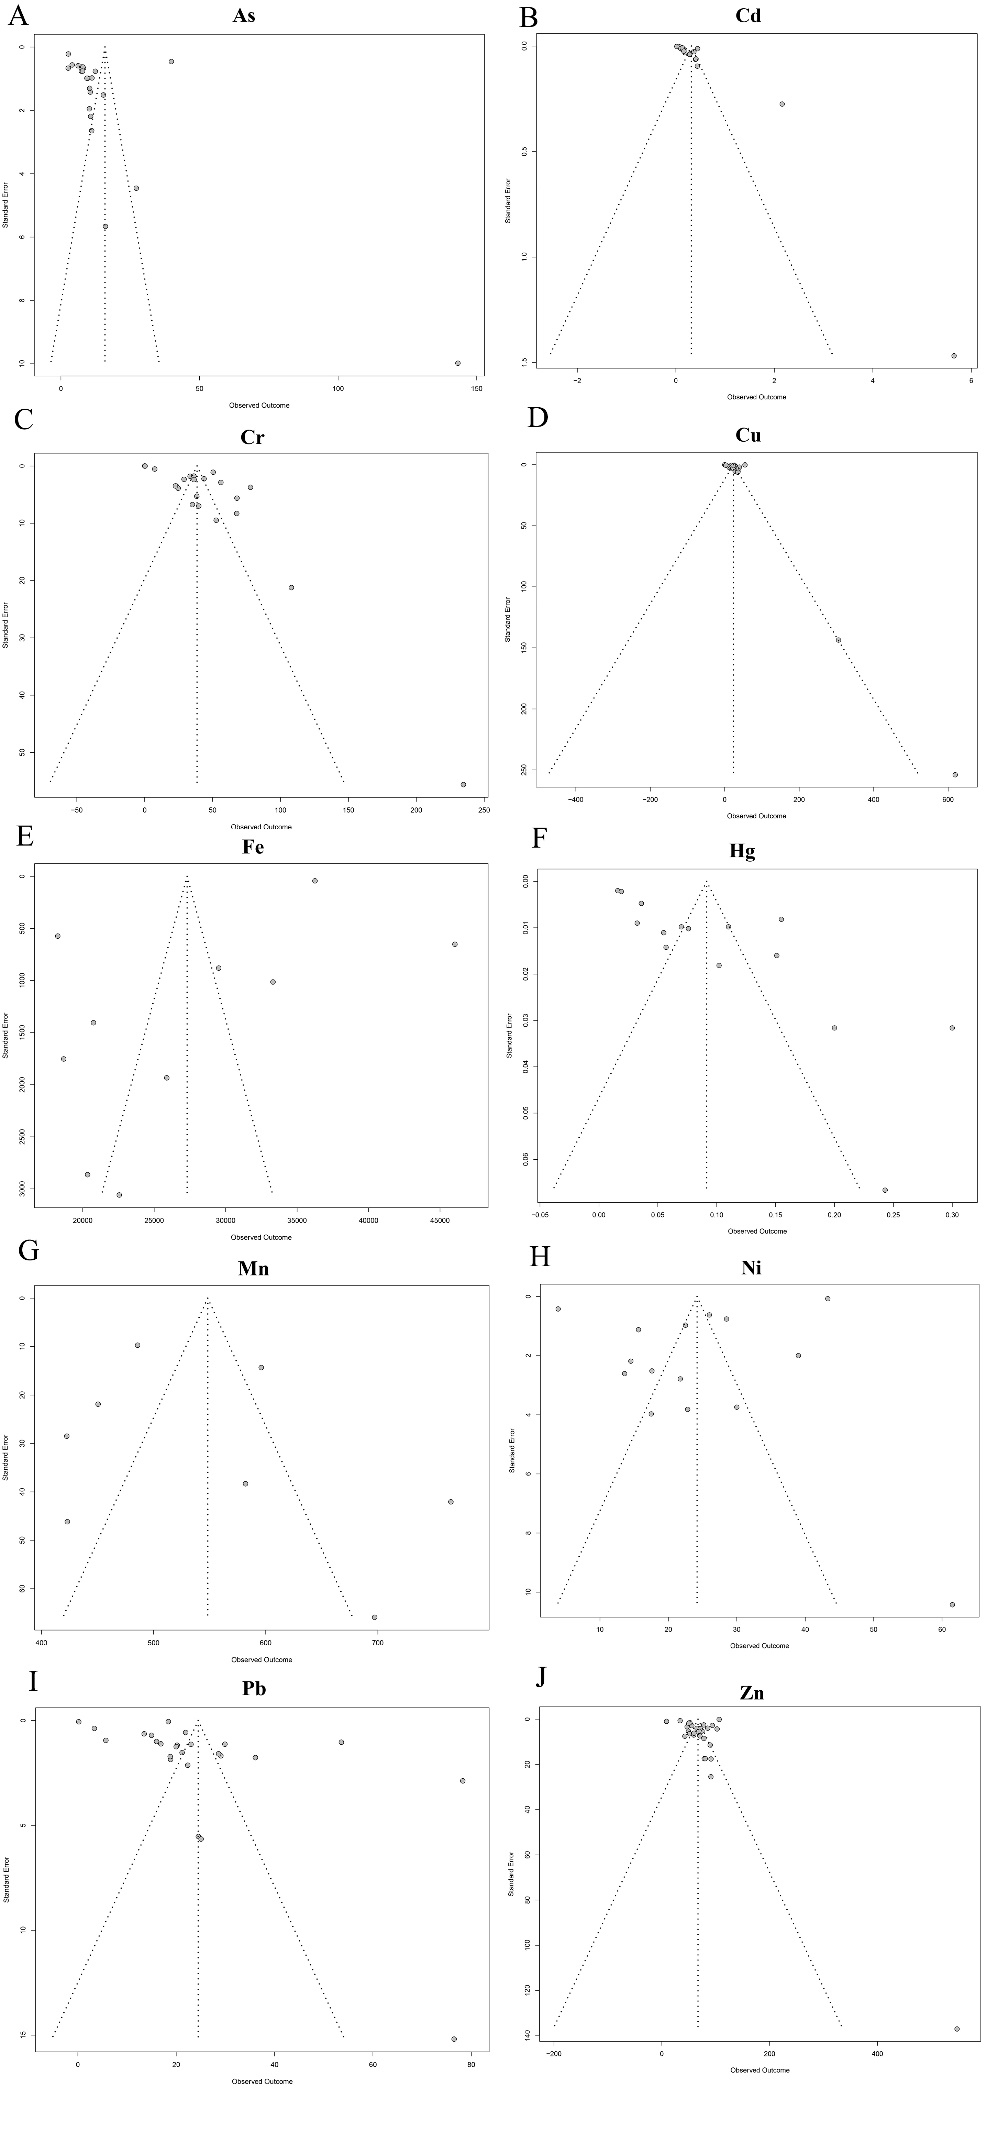
**

**Figure S6. Funnel plots of heavy metal content in sediments on the Mongolian Plateau used for assessing publication bias: (A) As; (B) Cd; (C) Cr; (D) Cu; (E) Fe; (F) Hg; (G) Mn; (H) Ni; (I) Pb; (J) Zn.**
